## Zinc nano-fertilization enhances wheat productivity and biofortification

Achchhelal Yadav<sup>1\*</sup>, Pramila Krishnan<sup>1</sup>, Monika Kundu<sup>1</sup>, Ram Swaroop Bana<sup>1\*</sup>, Shaloo<sup>1</sup>, Anil K. Choudhary<sup>1</sup>, Y.S. Shivay<sup>1</sup>, Samrath Lal Meena<sup>1</sup>, Shbana Begam<sup>2</sup>, Samarth Godara<sup>3</sup>, Rajeev Ranjan<sup>1</sup>, Sudhir Kumar<sup>1</sup>, Sunita Yadav<sup>1</sup>, M.S. Nain<sup>1</sup>, Teekam Singh<sup>1</sup>, Abhijeet Yadav<sup>4</sup> and Rishi Raj<sup>1</sup>

<sup>1</sup>ICAR-Indian Agricultural Research Institute, New Delhi-110012, India

<sup>2</sup>ICAR-National Institute for Plant Biotechnology, New Delhi-110012, India

<sup>3</sup>ICAR-Indian Agricultural Statistics Research Institute, New Delhi-110012, India

<sup>4</sup>Bundelkhand University, Jhansi-284128, India

\*Corresponding authors: [rsbana@gmail.com](mailto:rsbana@gmail.com) (RSB); [achchheyadav@yahoo.com](mailto:achchheyadav@yahoo.com) (AY)

### Abstract

Zinc (Zn) malnutrition has emerged as one of the major health challenges in developing nations across the globe. Development of Zn management protocols in staple food crops using modern scientific tools to enhance Zn concentration in grains along with augmented crop yields became utmost necessary. In this context a 2-year experiment was carried out to assess the effects of zinc oxide nanoparticles (ZnO-NPs) vis-à-vis bulk zinc sulfate (ZnSO<sub>4</sub>) on wheat growth, yield and Zn concentration in plant parts. Four levels of application of ZnO-NPs (0, 20, 25 and 30 mg kg<sup>-1</sup>) were compared with ZnSO<sub>4</sub> (equal to Zinc concentration in ZnO-NPs). Results revealed that seed vigor was significantly ( $p < 0.05$ ) higher under 25 and 30 mg kg<sup>-1</sup> soil ZnO-NPs treatments over ZnSO<sub>4</sub>. Among the crop yield parameters such as tillers (plant<sup>-1</sup>), grain weight (plant<sup>-1</sup>), biomass (plant<sup>-1</sup>) and grain yield were significantly ( $p < 0.05$ ) higher under ZnO-NPs 25 mg kg<sup>-1</sup> treated soil as compared to any other treatment. Zinc concentration in grains increased with dose of ZnO-NPs and it was significantly more than ZnSO<sub>4</sub> treated soil at each treatment level. ZnO-NPs and ZnSO<sub>4</sub> treatments did not affect photosynthetic rate and chlorophyll (SPAD) content significantly. In conclusion, 25 mg kg<sup>-1</sup> ZnO-NPs application

27 could be recommended in wheat cultivation to improve growth, yield and grain Zn  
28 biofortification.

## 29 **Introduction**

30 In the modern era nanotechnology is being used in almost all existing science fields [1-3]. As  
31 per the definition of nanotechnology, a particle should have a dimension in range of 1 to 100  
32 nanometers [4]. The size of material in nano-range increases its biocompatibility, surface area,  
33 electrical conductivity and antimicrobial activities, which makes it suitable for multi-uses [5-  
34 7]. Among the various NPs, zinc oxide (ZnO)-NPs are being used widely and their rank is  
35 fourth across the NPs [1]. In the recent past, the application of micronutrient NPs has emerged  
36 as a significant part of nutrient management schedules of crop plants owing to their potential  
37 advantages on productivity and quality gains [8-10]. Presently, soil and foliar applications of  
38 NPs in crops are under practice [11-15].

39 Zinc is an essential plant micronutrient and an integral part of biochemical processes of plants  
40 including protein synthesis [16-18]. The ZnO-NPs can perform the role as fertilizers,  
41 pesticides, growth regulators and herbicides [19-20]. The deficiency of micronutrients like Zn  
42 in soils reduces crop productivity as well as grain nutritional quality [21-23]. The constant  
43 decline in levels of soil Zn content across diverse agro-ecologies, has posed an alarming  
44 challenge to improve Zn content of grain and therefore Zn management has emerged as most  
45 important area of research during recent period [24]. The high solubility, small molecular  
46 weight and lower thermal stability of conventional fertilizers result in reduced efficacy and  
47 enhanced environmental pollution [25-27].

48 On the contrary, Zn application as nano-formulations enhances the fertilizer use efficiency due to  
49 greater surface area and specific properties. Further, lower runoff and leaching losses of nano-

50 particles would reduce soil and air pollution, while providing higher crop yields and nutrient uptake  
51 [28, 29]. Further, application of Zn in various formulations, including NPs, assists in enrichment  
52 of edible plant parts in Zn, resulting in reduced hidden hunger and Zn malnutrition [30, 31].

53 Zinc is also a crucial trace element for human health that has numerous regulatory and  
54 important enzymatic activities involved in various metabolic pathways and biochemical functions.  
55 After iron, Zn is the most profuse microelement available in the human body [32]. In the developing  
56 world, one third population is suffering with the deficiency of Zn, especially children and pregnant  
57 women [33-35]. Paucity of Zn in human body causes suboptimal health status, increased morbidity,  
58 mortality, physiological alterations, shortfall in growth, and infectious diseases [36]. The poor  
59 dietary variation and low intake of Zn may be the reasons for Zn deficiency in the developing nations  
60 [36, 37]. Wheat is an important cereal that provides required calories and proteins across the world.  
61 The production and consumption of Zn-enriched cereals, such as wheat, could be one of the most  
62 powerful weapons for fighting against Zn malnutrition. The ZnO-NPs are being used in industry for  
63 several decades. However, their application in the agriculture are not potentially explored. So far no  
64 much information is available on effect of soil application of ZnO-NPs on agronomic biofortification  
65 of wheat. Further, numerous focused information is available on productivity enhancement due to  
66 ZnO-NPs foliar application, however, detailed information on effects of ZnO-NPs on crop growth,  
67 yield attributing characters, rooting behavior and physiological plant parameters is not available.  
68 Likewise, knowledge gap also exists on Zn partitioning behaviour in different wheat plant parts  
69 under diverse Zn nutrition systems, including soil application of ZnO-NPs. Therefore, the present  
70 study was undertaken to evaluate the effect of ZnO-NPs on wheat growth, yield and physiological  
71 processes in the plant system. Furthermore, the current work also aimed to understand Zn

72 partitioning in different plant parts under ZnO-NPs and under ZnSO<sub>4</sub>. We hypothesized that ZnO-  
73 NPs application in soil may result in enhancement of wheat growth, yield and Zn biofortification.

## 74 **Method and materials**

### 75 **Description of site**

76 Present study was undertaken during 2019-20 and 2020-21 winter seasons at ICAR-Indian  
77 Agricultural Research Institute, New Delhi, India, in plastic pots (top diameter 32 and 34 cm height).  
78 In the experiment, seven treatments were evaluated with six replications in the completely  
79 randomized design (Table 2). The soil for pot filling (0-15 cm soil profile) was dugged and collected  
80 from MB 4C research farm of the Institute. The sand, silt and clay percent of dugged soil were 64.0,  
81 16.8 and 19.2%, respectively. The texture of soil was sandy loam [38]. The soil was dried, sieved  
82 with 1.0 cm sieve and properly mixed and filled in pots @ 17 kg pot<sup>-1</sup>. The soil had electrical  
83 conductivity (1:2 soil: water) of 0.15 dSm<sup>-1</sup>, pH 7.7, zinc concentration 0.78 mg kg<sup>-1</sup> and carbon  
84 content of 0.51% at the time of sowing. Experimental site is located in the Indo-Gangetic plains in  
85 north-west India at 28° 38' 23" N, 77° 09'27" E at an altitude of 228.6 m above mean sea level. It  
86 belongs to sub-tropical semiarid region and had total of rainfalls 306 and 71.1 mm from November  
87 2019 to April 2020 and from November 2020 to April 2021 (wheat growing periods), respectively.  
88 The mean maximum temperatures were 24.7 and 11.4 and minimum temperature were 11.4 and 10.6  
89 °C from November 2019 to April 2020 and November 2021 to April 2021, respectively. The  
90 respective mean relative humidity during both the study periods were 67.7 and 62.7%.

### 91 **Procurement of ZnO-NPs and ZnSO<sub>4</sub>**

92 The ZnO-NPs (Type I) approximately 30 nm size were procured from Sisco Research Laboratories  
93 (SRL) Pvt. Ltd. (Batch No. 8628965; Manufactured date 06 June, 2017; Expiry/ Retest date 6<sup>th</sup>

94 June 2022). The ZnO-NPs were characterized using transmission electron microscopy (Fig 1) [39].  
95 The ZnSO<sub>4</sub> was also purchased from SRL (Batch No.:011219).

### 96 **Experiment on Germination**

97 The seeds of wheat were selected carefully and were sterilized for 10 minutes with solution of 1%  
98 hydrogen peroxide (H<sub>2</sub>O<sub>2</sub>) and washed 3 times with double distilled water for insuring their sterility  
99 [40]. Solutions of different concentration of ZnO-NPs (0, 340, 425, 510 mg litre<sup>-1</sup>) and 836, 1050  
100 and 1254 mg litre<sup>-1</sup> ZnSO<sub>4</sub> (equivalent to ZnO-NPs) were prepared by dissolving ZnO-NPs and  
101 ZnSO<sub>4</sub> in double distilled water (volume was maintained 1 litre). Concentrations of ZnO-NPs and  
102 ZnSO<sub>4</sub> dispersions were equivalent to the total concentrations which were applied to the pot soil  
103 during crop growth period. Thirty seeds of wheat were put in germination paper to assess  
104 germination (%) and seed vigor. A 30 ml solution of different concentration of ZnO-NPs and bulk  
105 ZnSO<sub>4</sub> were poured in each germination paper in six replicates. The germination papers were kept  
106 in a dark incubator at 29 ±1.1 °C. Germination of seeds was recorded after every 24 hours till 7  
107 days. Seedlings length, seedlings biomass and root biomass were determined after 7 days, the  
108 samples were kept in the oven (at 65 °C) for drying. Pot soil was washed and roots samples were  
109 collected in triplicate for the measurement of root parameters.

### 110 **Crop fertilization**

111 The optimum amount of N (half dose; 6.5 g pot<sup>-1</sup>), P<sub>2</sub>O<sub>5</sub> (3.8 g pot<sup>-1</sup>) and K<sub>2</sub>O (3.1 g pot<sup>-1</sup>) fertilizers  
112 were applied in the pot soil during the sowing. The 50% of nitrogen dose was given at the time of  
113 sowing and remaining doses were applied in two equal parts at vegetative and flowering stages,  
114 respectively. The full doses of P<sub>2</sub>O<sub>5</sub> and K<sub>2</sub>O were applied at once during the sowing. Apart from  
115 required N, P and K fertilizers, the pot soil was treated with ZnO-NPs as well zinc sulfate  
116 (ZnSO<sub>4</sub>.7H<sub>2</sub>O). The ZnO-NPs and ZnSO<sub>4</sub> were weighed using an electronic balance (Aair Dutt

117 ViBRA AJ). The ZnO-NPs as well bulk ZnSO<sub>4</sub> solution were prepared with double distilled water.  
118 Stirrer was used to mix properly ZnO-NPs and bulk ZnSO<sub>4</sub> in double distilled water. This solution  
119 was poured in the pot soils in six different treatments [T1: 0 mg kg<sup>-1</sup>; T2: 20 mg kg<sup>-1</sup> ZnO-NPs;  
120 T3: 25 mg kg<sup>-1</sup> ZnO-NPs; T4: 30 mg kg<sup>-1</sup> ZnO-NPs; T5: 20 mg kg<sup>-1</sup> ZnSO<sub>4</sub> (equivalent to Zn  
121 Content in T2); T6: 25 mg kg<sup>-1</sup> ZnSO<sub>4</sub> (equivalent to Zn in T3); and T7: 30 mg kg<sup>-1</sup> ZnSO<sub>4</sub> (Zn  
122 equivalent to T4)] before the sowing and mixed appropriately (Table 1). The equivalent amount of  
123 Sulphur of ZnSO<sub>4</sub> was applied in the ZnO-NP treatments using elemental Sulphur. The sowing of  
124 crop was done at 5 cm plant to plant distance and 22.5 cm row to row distance during both the  
125 cropping seasons. The sowing of wheat in pot soil was done on 20 November 2019 and 18  
126 November 2020 with 2-rows of wheat in each pot. The harvesting of crops was done on 17 April  
127 and 14 April of 2020 and 2021, respectively

#### 128 **Measurement of plant growth parameters**

129 The seedling vigor index 1 after 7 days of planting was determined using the formula germination  
130 (%) × shoot length of the seedling. The photosynthetic rate (Pn), stomatal conductance chlorophyll  
131 content was determined at the pre-flowering stage of crop growth. The photosynthetic rate was  
132 measured using LI-6400XT Portable Photosynthetic System (Model No. LI-6400XT, LI-COR,  
133 USA). The chlorophyll content was determined using the SPAD (SPAD-502 Plus).

#### 134 **Determination of yield and yield attributes**

135 Five representative plants were selected from each treatment and harvested at maturity. Later, plant  
136 samples were separated into stem, leaves and spikes and exposed to heat burst in microwave. These  
137 samples were dried in oven at 65 °C for 48 hours [41]. The crop yield and yield attributes such as  
138 spike length (cm), spikelets (spike<sup>-1</sup>), number of grains (spike<sup>-1</sup>), grain weight (g spike<sup>-1</sup>), biomass

139 (g plant<sup>-1</sup>), grain yield (g plant<sup>-1</sup>), harvest index (grain yield divided by biomass multiplied by 100)  
140 and 1,000-grain weights (g) were determined.

#### 141 **Determination of zinc in different parts of wheat**

142 The 0.5 g fine grinded wheat samples of root, stem, leaves and grains were taken and digested with  
143 the mixed solution of concentrated HNO<sub>3</sub> and HClO<sub>4</sub> acids (in 9:4 ratio) in a conical flask [42].  
144 The flasks were kept for digestion on hot plate for heating (3.5 hours) or until a colorless residue  
145 was left in the digestion vessel. After cooling, the residue was mixed with a diluted solution of  
146 H<sub>2</sub>SO<sub>4</sub> (0.1 N) and volume was made up to 100 ml. The digested samples were taken for estimating  
147 Zn using atomic absorption spectrometry at 213.9 nm (AAS PLUS, Motras Scientific, India).

#### 148 **Statistical analysis**

149 The crop growth, yield and quality attributes of wheat (variety: HD 2967) were assessed using 9.3  
150 SAS statistical software. One-way analysis of variance (ANOVA) was used to evaluate the effects  
151 of ZnO-NPs and their counterpart conventional fertilizer ZnSO<sub>4</sub> application on soils. The data were  
152 compared at 95 % confidence level ( $p < 0.05$ ) to test statistical significance.

153

## 154 **Results**

### 155 **Effect of ZnO-NPs on seedling shoot lengths, biomass and seedling vigor I**

156 Among different zinc application treatments (through zinc oxide nanoparticles and zinc sulfate  
157 forms), the germination was higher in the initial four days under each dose of ZnO-NPs (T2-T4)  
158 vis-à-vis in ZnSO<sub>4</sub> (T5-T7), but it was non-significantly different across the treatments (T1-T7)  
159 (data not given). The seedling growth was assessed using shoot length, root length and dry weight  
160 of seedlings (Fig 2). Results showed that the root length (cm) on the seventh day after sowing was

161 significantly more under 20 and 25 mg litre<sup>-1</sup> ZnO solution (21.3% in T2 and 6.79% in T3)  
162 treatment, however it reduced notably (-7.8 to -32.0%) under other treatments of ZnO-NPs as well  
163 as ZnSO<sub>4</sub> (T4-T7) as compared to control (Fig 3A). The shoot length relative (%) to control was  
164 significantly more (p <0.05) under T2 (15.8%) and T3 (5.0%) treatments, while no significant  
165 changes were observed in other treatments (Fig 3B). Seedling dry weight showed non-significant  
166 enhancement under the ZnO-NPs treatments, however, the ZnSO<sub>4</sub> treatments resulted in a  
167 significant reduction over the control (Fig 3C).

### 168 **Effect of ZnO-NPs and ZnSO<sub>4</sub> on photosynthetic rate and SPAD**

169 The photosynthetic rate and SPAD values did not change significantly under ZnO-NPs and under  
170 ZnSO<sub>4</sub> treatments over the control (Table 2). Tiller plant<sup>-1</sup> (ranged from 6.2 to 8.2) were recorded  
171 24 % higher under the T3 treatment (ZnO-NPs 25 mg kg<sup>-1</sup>) over the control (T1) (Table 2).  
172 Similarly, as compared to T6, a 22.7% enhancement in the number of tillers was noticed under T3.

### 173 **Effect of ZnO-NPs on yield attributes**

174 The mean of two years of biomass (plant<sup>-1</sup>) ranged from 11.9 g (plant<sup>-1</sup>) in control and 14.5 and  
175 12.8 g plant<sup>-1</sup> in ZnO-NPs and ZnSO<sub>4</sub> treatments, respectively (Table 3). Data revealed that the  
176 biomass (plant<sup>-1</sup>) was significantly higher under 25 mg kg<sup>-1</sup> ZnO-NPs treated soil (T3) than that of  
177 any other treatment of ZnO-NPs and ZnSO<sub>4</sub>. The percent biomass increase under T3 was 22.8%  
178 as compared to control. The comparison of biomass between T3 and T6 treatments showed that 25  
179 mg kg<sup>-1</sup> (T3) treated soil recorded 13.3% higher biomass (plant<sup>-1</sup>) over ZnSO<sub>4</sub> treated soil (T6),  
180 which suggest that the ZnO-NPs use is more efficient than its counterpart ZnSO<sub>4</sub> fertilizer  
181 (Table 3). The grains (spike<sup>-1</sup>) were statistically non-significant (p>0.05) across the treatments.  
182 Grain weight (g) ranged from 1.1-1.3 g spike<sup>-1</sup>. The grain weight (g spike<sup>-1</sup>) was significantly  
183 higher under ZnO-NPs treatment than any other treatment. It increased by 18.2% under T3 than



184 T6 (Table 3). Similar to biomass, grain yield ( $\text{g plant}^{-1}$ ) ranged from  $5.9 \text{ g plant}^{-1}$  (control) to  $7.8 \text{ g}$   
185  $\text{plant}^{-1}$  (ZnO-NPs). Data revealed that the grain yield was significantly ( $p < 0.05$ ) higher in T3 than  
186 that of any other treatment (Table 3). Comparative assessment between grain yields of T3 and T6  
187 treatments indicated that the grain yield under T3 was 16.6% greater than T6 (Table 3). This  
188 suggests that  $25 \text{ mg kg}^{-1}$  ZnO-NPs treatment (T3) remained more efficient than its equivalent  
189  $\text{ZnSO}_4$  (T6) treatment for grain yield of wheat. The 1,000-grain weight and harvest index (%) did  
190 not change significantly across the treatments (Table 3).

### 191 **Effect of ZnO-NPs on Zn content in below- and above-ground biomass**

192 The Zn concentration in roots increased from  $31.7$  (T1) to  $78.9 \text{ mg kg}^{-1}$  (T4). Under the ZnO-NP  
193 treatments it ranged from  $41.9$  to  $78.9 \text{ mg kg}^{-1}$  (T2-T4) and in  $\text{ZnSO}_4$  soil treatments it ranged from  
194  $32.2$  to  $37.2 \text{ mg kg}^{-1}$  (T5-T7) (Table 4). Concentration of Zn in roots of T4 was 2.48 times more  
195 than that of T1 (Table 4). Similarly, the concentration of Zn in roots under  $\text{ZnSO}_4$  treated soil (T7)  
196 was higher by 17.4% over the control treatment (T1). Comparison of data between treatments T4  
197 and T7 (highest doses of ZnO NPs and  $\text{ZnSO}_4$ ) also suggests that the concentration of Zn in roots  
198 under T4 (counter part of T7) was significantly more (112.1%) as compared to T7 treatment (Table  
199 4). The Zn concentration in stem ranged from  $20.2 \text{ mg kg}^{-1}$  (control) to  $30.7$  and  $27.2 \text{ mg kg}^{-1}$  under  
200 ZnO-NPs and  $\text{ZnSO}_4$  treated soils respectively. Zn concentration was more by 51.9% and 34.6%  
201 at T4 and T7 soil treatment over the T1 (control). Concentration of zinc was increased by 12.9%  
202 under T4 over T7. From the above, it could be concluded that the Zn absorption was taking place  
203 more efficiently under ZnO-NPs treated soil than  $\text{ZnSO}_4$  applied soil (Table 4).

204 The Zn concentration in crop leaves was significantly increased with increase in the levels of ZnO-  
205 NPs as well as  $\text{ZnSO}_4$  in pot soils. The mean Zn concentration in leaves ranged from  $7.4 \text{ mg kg}^{-1}$   
206 (control) to  $23.5$  and  $27.4 \text{ mg kg}^{-1}$  in ZnO-NPs and  $\text{ZnSO}_4$  treated soils, respectively. It is obvious

207 from data that the mean of Zn concentration in leaves was more (36.4%) under ZnSO<sub>4</sub> treated soil  
208 over ZnO-NPs treated soil (Table 4). The Zn concentration in grains ranged from 31.7 mg kg<sup>-1</sup>  
209 (control) to 49.0 and 36.6 mg kg<sup>-1</sup> under ZnO-NPs and ZnSO<sub>4</sub> treated soils, respectively. A 17.7%  
210 increase in the Zn concentration in grains under ZnO-NPs (T2-T4) treated soil was witnessed as  
211 compared to ZnSO<sub>4</sub> treated soil (T5-T7). The comparison between Zn contents of grains at ZnO-  
212 NPs and ZnSO<sub>4</sub> treated highest doses (T4 and T7) highlighted that Zn content under ZnO-NP  
213 treatment was more by 33.9% than ZnSO<sub>4</sub> treatment (Table 4). It indicated that the Zn use  
214 efficiency was significantly higher when Zn was applied in the form ZnO-NPs instead of ZnSO<sub>4</sub>  
215 bulk.

## 216 **Discussion**

### 217 **Zinc nano-fertilization effects on growth and physiology**

218 The advanced nano-engineering may be a handy tool for achieving food security in a sustainable  
219 manner. The use of nano-fertilizers improves crop production by enhancing nutrient use efficiency  
220 due to reduced losses by more stability and lesser solubility [26, 27]. In the present study, seedling  
221 length was 6.8-21.3% higher on the seventh day after putting on petri dishes under ZnO-NPs  
222 solution over control (Fig 3 A-C). The mean values were significantly more under ZnO-NPs  
223 treatments over the ZnSO<sub>4</sub> suspension. Our results are in line with the previous research [14].  
224 Wherein, it was noticed that the seedling growth and root and shoot length were increased in lower  
225 doses of ZnO-NPs and ZnSO<sub>4</sub> treatments but negatively affected in concentrations above 50 mg  
226 litre<sup>-1</sup> [14]. Similarly, it was also noticed in earlier work that the lower concentrations of zinc  
227 chloride (ZnCl<sub>2</sub>) are beneficial for seedlings growth, whereas, the higher concentration adversely  
228 effects vetch root length [43]. Greater stability, reduced solubility and sustained availability of Zn  
229 under ZnO-NP treatments might have enhanced the root and shoot length, whereas, under ZnSO<sub>4</sub>

230 treatments, reduced surface area contact of roots and lower availability might have led to lower  
231 root growth [14,43].

232 The seedling vigor 1 was significantly more ( $p < 0.05$ ) under ZnO-NPs (T2-T3) treatment than that  
233 of ZnSO<sub>4</sub> treatments. It might be due to increased length of seedlings in the treatments T2 and T3  
234 (Table 2). In previous work it has been demonstrated that nanoparticles have potential to  
235 augmenting seedling germination and its growth by way of stimulation of enzymatic activities [44-  
236 -47]. Similarly, it was recorded that the nano technological interventions improves crop health and  
237 yield sustainably [48,49]. The hydroxyapatite nano coated urea releases N slowly and uniformly  
238 over 60 days, whereas, the traditional bulk fertilizer applied N gets lost within 30-day with uneven  
239 release, resulting in reduced N-use efficiency and poor crop growth [50]. Contrarily, some studies  
240 have also reported that nano-fertilization adversely affects germination and crop growth. Such type  
241 of inconsistency might be due to diverse mode of application of nanoparticles, their shape, size,  
242 electronic properties as well as surface coating and species of plants [51,52].

243 In our experiment, photosynthetic rates of wheat at vegetative stage remained statistically on par  
244 across the treatments, which might be due to non-significant difference in chlorophyll content  
245 (SPAD values) under different treatments (Table 2). Crop growth and productivity is a function  
246 of complex system. The photosynthesis is source of carbon and energy, that the entire system is  
247 dependent upon, however, such interactions are not linear and relies on diverse variables [53]. It  
248 has been witnessed from several past studies that crop output enhancements are not correlated  
249 linearly with gains in photosynthesis [54]. Moreover, in previous work it has also been clearly  
250 demonstrated that 15 mg kg<sup>-1</sup> ferrous and silicon oxide NPs treatment to the soil improved shoot  
251 length of maize and barley seedlings by about 20.8% and 8.2%, respectively. Moreover, 25 mg  
252 kg<sup>-1</sup> treatment negatively affected seedlings length of maize which indicates that the crop growth

253 effects due to nanofertilizers is dose dependent [55,56]. Further, our study showed that the tillers  
254 plant<sup>-1</sup> were significantly more under T3 as compared to other treatments. Due to  
255 nanofertilization, 7.7-24.6% enhancement in tiller count was noticed as compared to T1. The more  
256 durability, less leaching and reduced desorption may be the reasons for prolonged nutrient  
257 availability to the plants resulting in more tillers (Table 2). Previous reports demonstrated that the  
258 plant growth of spinach, cucumber, tomato, wheat and mungbean positively responded to NPs  
259 application [57-59]. On the contrary, some reports stated that excessive application of NPs forms  
260 reactive oxygen species (ROS) that block nutrient transport channels by their aggregation, which  
261 results in reduction in plant growth and quality [60,61].

#### 262 **Wheat biomass and yield enhancement**

263 The T3 treatment showed significant improvement in biomass and yield. Enhancement in biomass  
264 and grain yield under T3 treatment may be due to the more tillers (plant<sup>-1</sup>), grain weight spike<sup>-1</sup>  
265 and spike length (Table 2-3). Previous studies also highlighted that the ZnO-NPs application  
266 increased the grain yield of wheat by 56-63% under different doses of ZnO-NPs over the control.  
267 However, under higher dose (1,000 mg kg<sup>-1</sup>) significant reduction in yield levels were reported  
268 [14]. In another study it has been noticed that ZnO-NPs application increased the number of  
269 soybean pods, though, average seed per pod and their size did not change between the treatments  
270 [62]. Majority of earlier findings suggested that the conventional fertilizer use efficiency hardly  
271 exceeds 30-40% owing to leaching, run off, hydrolysis, drift, evaporation, microbial degradation  
272 and photolytic activity [63,64]. Nonetheless, nano-formulation of fertilizers increases their use  
273 efficiency due to high stability and higher absorption [28,29].

#### 274 **Zn partitioning in plant system and biofortification**

275 In our study, Zn concentration in roots, leaves, shoots and grains increased with increase in doses  
276 of ZnO-NPs as well as ZnSO<sub>4</sub>. Higher improvement in Zn concentration in grains due to ZnO-NPs  
277 (9.5-54.6%) as compared to Zn enrichment owing to ZnSO<sub>4</sub> (7.6-15.5%) under the current study  
278 is in similar lines with earlier findings [60]. However, the partitioning behavior under different  
279 plant parts varied significantly. In wheat grain, root and stem, Zn concentrations remained higher  
280 with ZnO-NPs application as compared to ZnSO<sub>4</sub>. Contrarily, ZnSO<sub>4</sub> treatments increased Zn  
281 concentration in wheat leaves by 185-270%, whereas under ZnO-NPs the improvement remained  
282 lower (54.1-217%). This may be due to enhanced translocation of Zn towards grain due to better  
283 source-sink channel and improved use efficiency of applied Zn under ZnO-NPs fertilizer over  
284 conventional (bulk) ZnSO<sub>4</sub> [65]. Our results corroborate previous findings concerned with  
285 increased zinc concentration in different plant parts using ZnO-NPs [14].

## 286 Conclusions

287 The application of nano-engineered fertilizers could be helpful in tackling malnutrition and  
288 achieving the food security sustainably by the way of their stimulation in nutrient concentration in  
289 edible portion of plants. Fertilizers in nano-scale assure better conservation and management of  
290 inputs of plant production as well as protection of environment from pollution. In the present study,  
291 it has been demonstrated that zinc oxide nanoparticles (ZnO-NPs) are having good potential to  
292 improve crop growth and yield as well as Zn concentrations in various plant parts at lower doses  
293 over the conventional ZnSO<sub>4</sub>. Present study suggests that 25 mg kg<sup>-1</sup> ZnO-NPs dose remained most  
294 appropriate for maximizing crop growth and yield. Significant enhancement in Zn concentration  
295 in edible plant parts owing to ZnO-NPs application would have good implications on tackling Zn  
296 hidden hunger and malnutrition of human population. The future research on the similar aspect  
297 may focus on evaluating different ZnO-NPs under large plot size in different crops under a

298 cropping system mode. Likewise, a thorough study on understanding Zn release pattern and finding  
299 out threshold limits of ZnO-NPs in enhancement in Zn content and yield in different crops could  
300 be innovative lines for future work.

301

302 **Author Contribution:** Conceptualization, A.Y., Y.S.S., R.S.B. and P.K.; Data curation, S.G.,  
303 S.B., S.Y. and M.K.; Methodology, A.K.C., A.Y. and S.L.M.; Experiment conduction, R.Y.,  
304 R.R., Abhijeet, A.Y. and S.K.; Data collection and analysis, Shaloo, S.K. and T.S.; Resources,  
305 R.Y., R.R., M.S.N. and Abhijeet.; Writing of draft, A.Y., S.G. and R.S.B.; Review and editing:  
306 Y.S.S., A.K.C., A.Y.

307 **Data availability:** All relevant raw data about soil and plant are within the paper

308 **Funding:** The study was funded by ICAR-IARI, New Delhi (Project No. CRSC IARISIL  
309 2014028260). The funder had no role in the study design, data collection and analysis,  
310 decision to publish, and preparation of the manuscript.

311 **Competing interests:** The authors have declared that no competing interests exist.

## 312 References

- 313 1. Keller AA, Mc Ferran S, Lazareva A, Suh S. Global life cycle releases of engineered  
314 nanomaterials. *Journal of Nanoparticle Research*. 2013; 15(6): 1-17.1.
- 315
- 316 2. Wang Y, Zhang W, Wu X, Luo C, Wang Q, Li J, Hu L. Conducting polymer coated metal-  
317 organic framework nanoparticles: facile synthesis and enhanced electromagnetic absorption  
318 properties. *Synthetic Metals*. 2017; 228: 18-24.
- 319 3. Kabir E, Kumar V, Kim K H, Yip A C, Sohn J. Environmental effects of  
320 nanomaterials. *Journal of Environmental Management*. 2018; 225: 261-271.
- 321
- 322 4. Klaine S J, Alvarez P J, Batley G E, Fernandes T F, Handy R D, Lyon D Y, Lead J R.  
323 Nanomaterials in the environment: behavior, fate, bioavailability, and effects. *Environmental*  
324 *Toxicology and Chemistry: An International Journal*. 2008; 27.9: 1825-1851.
- 325
- 326 5. Wang P, Lombi E, Zhao F J, Kopittke P M. Nanotechnology: a new opportunity in plant  
327 sciences. *Trends in Plant Science*, 2016; 21.8: 699-712.
- 328

- 329 6. Moghaddasi S, Fotovat A, Khoshgoftarmanesh AH, Karimzadeh F, Khazaei HR, Khorassani  
330 R. Bioavailability of coated and uncoated ZnO nanoparticles to cucumber in soil with or  
331 without organic matter. *Ecotoxicology and Environmental Safety*. 2017; 144: 543-551.  
332
- 333 7. Hou J, Yang Y, Wang P, Wang C, Miao L, Wang X, Liu Z. Effects of CeO<sub>2</sub>, CuO, and ZnO  
334 nanoparticles on physiological features of *Microcystis aeruginosa* and the production and  
335 composition of extracellular polymeric substances. *Environmental Science and Pollution  
336 Research*. 2017; 24 (1): 226-235.  
337
- 338 8. Tolaymat A, Genaidy A, Abdelraheem W, Dionysiou D, Andersen C. The effects of metallic  
339 engineered nanoparticles upon plant systems: an analytic examination of scientific evidence.  
340 *Science of The Total Environment*. 2017; 579: 93-106.  
341
- 342 9. Dimkpa C, Bindraban P. Nanofertilizers: new products for the industry. *Journal of  
343 Agricultural and Food Chemistry*. 2017; 66 (26): 6462-6473.  
344
- 345 10. White JC, Gardea-Torresdey JL. Achieving food security through the very small. *Nature  
346 Nanotechnology*, 2018; 13 (8): 627-629.  
347
- 348
- 349 11. Chhipa H. Nanofertilizers and nanopesticides for agriculture. *Environmental chemistry  
350 letters*, 2017, 15 (1): 15-22.  
351
- 352 12. Mahmoud Abdel Wahab M, Emad A, Abdeldaym Suzy M, Abdelaziz Mohamed BI El-Sawy,  
353 Shady A. Mottaleb. Synergetic effects of zinc, boron, silicon, and zeolite nanoparticles on  
354 confer tolerance in potato plants subjected to salinity. *Agronomy*. **2019**. (10), 119.  
355
- 356 13. Dimka C O, Singh U S Prem, Bindraban Elmer WH, Jorge, L, Torresdey G, White JC. Zinc  
357 oxide nanoparticles alleviate drought-induced alterations in sorghum performance, nutrient  
358 acquisition and grain fortification. *Science of the Total Environment*. 2019; 688: 926-934.
- 359 14. Du W, Yang J, Peng Q, Liang X, Mao H. Comparison study of zinc nanoparticles and zinc  
360 sulphate on wheat growth: From toxicity and zinc biofortification. *Chemosphere*. 2019; 227:  
361 109-116.  
362
- 363 15. Adrees M, Khan ZS, Hafeez M, Rizwan M, Hussain K, Asrar M, Alyemeni MN, Wijaya L,  
364 Ali S. Foliar exposure of zinc oxide nanoparticles improved the growth of wheat (*Triticum  
365 aestivum* L.) and decreased cadmium concentration in grains under simultaneous Cd and water  
366 deficient stress. *Ecotoxicology and Environmental Safety*. 2021; 208: 111627.  
367
- 368
- 369 16. Sturikova H, Krystofova O, Huska D, Adam V. Zinc, zinc nanoparticles and plants. *Journal  
370 of Hazardous Materials*. 2018; 349: 101-110.  
371
- 372 17. Kambe T, Tsuji T, Hashimoto A, Itsumura N. The physiological, biochemical, and molecular  
373 roles of zinc transporters in zinc homeostasis and metabolism. *Physiological reviews*, 2015.  
374

- 375  
376 18. Lee JS, Wissuwa M, Zamora OB, Ismail AM. Biochemical indicators of root damage in rice  
377 (*Oryza sativa*) genotypes under zinc deficiency stress. *Journal of Plant Research*. 2017; 130  
378 (6): 1071-1077.  
379  
380  
381 19. Khot LR, Sankaran S, Maja JM, Ehsani R, Schuster EW. Applications of nanomaterials in  
382 agricultural production and crop protection: a review. *Crop Protection*. 2012; 35: 64-70.  
383  
384 20. Ditta A, Arshad M. Applications and perspectives of using nanomaterials for sustainable plant  
385 nutrition. *Nanotechnology Review*. 2016; 5: 209–229. 2016.  
386  
387  
388 21. Singh MV. Micronutrient deficiencies in crops and soils in India. In *Micronutrient*  
389 *deficiencies in global crop production* (pp. 93-125). Springer, Dordrecht (2008).  
390 22. Phattarakul N, Rerkasem B, Li LJ, Wu LH, Zou CQ, Ram H, Sohu VS, Kang BS, Surek H,  
391 Kalayci M, Yazici A. Biofortification of rice grain with zinc through zinc fertilization in  
392 different countries. *Plant and Soil*, 2011, 338.1: 143-158.  
393 23. Chen XP, Zhang YQ, Tong YP, Xue YF, Liu, DY, Zhang W, Deng Y, Meng Q F, Yue SC,  
394 Yan P, Cui ZL. Harvesting more grain zinc of wheat for human health. *Scientific Reports*.  
395 2017; 7 (1): 1-8.  
396 24. Bana RS, Jat GS, Grover M. *et al.* Foliar nutrient supplementation with micronutrient-  
397 embedded fertilizer increases biofortification, soil biological activity and productivity of  
398 eggplant. *Scientific Reports*. 2022;12(1), 1-16.  
399 25. Janmohammadi M, Amanzadeh T, Sabaghnia N, Dashti S. Impact of foliar application of nano  
400 micronutrient fertilizers and Titanium dioxide nanoparticles on the growth and yield  
401 components of barley under supplemental irrigation. *Acta Agriculturae Slovenica*. 2016;  
402 107(2): 265-276.  
403  
404 26. Liu R, Lal R. Synthetic apatite nanoparticles as a phosphorus fertilizer for soybean (*Glycine*  
405 *max*). *Scientific Reports*. 2014; 4 (1): 1-6.  
406  
407 27. Yan H, Chen Q, Liu J, Feng Y, Shih K. Phosphorus recovery through adsorption by layered  
408 double hydroxide nano-composites and transfer into a struvite-like fertilizer. *Water Research*.  
409 2018; 145: 721-730.  
410  
411 28. Prasad R, Bhattacharyya A, Nguyen Q D. Nanotechnology in sustainable agriculture: recent  
412 developments, challenges, and perspectives. *Frontiers in Microbiology*. 2017; 8: 1014.  
413  
414  
415 29. Liu C, Zhou H, Zhou J. The Applications of Nanotechnology in Crop  
416 Production. *Molecules*. 2021; 26(23): 7070.  
417  
418 30. Bana RC, Gupta AK, Bana RS, Shivay YS, Bamboriya SD, Thakur NP, Puniya R, Gupta M,  
419 Jakhar SR, Kailash, Chaudhary RS, Bochalya RS, B Ajaya T, Kumar V, Kumar P, Choudhary



- 420 A.K. Zinc-coated urea for enhanced zinc biofortification, nitrogen use efficiency and yield  
421 of basmati rice under typical fluvents. *Sustainability*. 2021; 14 (1): 104.  
422
- 423 31. Ankit, Bana RS, Rana KS, Singh R, Godara S, Grover M, Yadav A, Choudhary AK, Singh T,  
424 Choudhary M, Bansal R, Singh N, Mishra V, Chaudhary A, Yogi AK. No-Tillage with  
425 Residue Retention and Foliar Sulphur Nutrition Enhances Productivity, Mineral  
426 Biofortification and Crude Protein in Rainfed Pearl Millet under Typical Haplusteps:  
427 Elucidating the Responses Imposed on an Eight-Year Long-Term  
428 Experiment. *Plants*. 2022; 11: 943.  
429
- 430 32. Hotz C, Brown K H. Assessment of the risk of zinc deficiency in populations and options for  
431 its control. *Journal of Food Security*. 2017; 5 (6): 232-247.  
432
- 433 33. Bouis HE, Saltzman A. Improving nutrition through biofortification: A review of evidence  
434 from Harvest Plus, 2003 through 2016. *Global Food Security*. 2016; 12, 49–58.  
435
- 436
- 437 34. WHO. Vitamin and Mineral Nutrition Information System. World Health Organization  
438 [www.who.int](http://www.who.int). (2016).  
439
- 440 35. Pooniya V, Choudhary A K, Bana R S, Pankaj. Zinc bio-fortification and kernel quality  
441 enhancement in elite Basmati rice (*Oryza sativa*) cultivars of south Asia through legume  
442 residue-recycling and zinc fertilization. *Indian Journal of Agricultural Sciences*, 2019, 89.2:  
443 279-287.  
444
- 445 36. Gibson R S. The role of diet- and host-related factors in nutrient bioavailability and thus in  
446 nutrient-based dietary requirement estimates. *Food and Nutrition Bulletin*. 2007; 28: 77–100.  
447
- 448
- 449 37. Choudhary GL, Rana KS, Rana DS, Bana RS, Prajapat K, Choudhary M. Moisture  
450 management and zinc fortification impacts on economics, quality and nutrient uptake of  
451 pearl millet (*Pennisetum glaucum* L.) under rainfed conditions. *Indian Journal of Agricultural  
452 Sciences*, 2016, 86 (1): 71-77.  
453
- 454 38. Pradhan, S.; Chopra, U.K.; Singh, R. Comparative study on soil water functional relationship  
455 in Two texturally different inceptisols.) *Journal of Agricultural Physics*. 2010; 10(1/2): 16-20.  
456
- 457 39. Yadav A, Prasad V, Kathe A A, Raj S, Yadav D, Sundaramoorthy C, Vigneshwaran N.  
458 Functional finishing in cotton fabrics using zinc oxide nanoparticles. *Bulletin of materials  
459 Science*. 2006; 29 (6): 641-645.  
460
- 461 40. Zhou L, Hou H, Yang T, Lian Y, Sun Y, Bian Z, Wang C. Exogenous hydrogen peroxide  
462 inhibits primary root gravitropism by regulating auxin distribution during Arabidopsis seed  
463 germination. *Plant Physiology and Biochemistry*. 2018; 128: 126-133.  
464

- 465 41. Pelletier S, Tremblay GF, Bertrand A, Bélanger G, Castonguay Y, Michaud R. Drying  
466 procedures affect non-structural carbohydrates and other nutritive value attributes in forage  
467 samples. *Animal Feed Science and Technology*. 2010; 157(3-4): 139-150.  
468
- 469 42. Jackson ML. *Soil Chemical Analysis*. Prentice Hall of India, New Delhi. 1973; 41–330.  
470  
471
- 472 43. García-Gómez C, Babin M, Obrador A, Álvarez JM, Fernández M D. Integrating ecotoxicity  
473 and chemical approaches to compare the effects of ZnO nanoparticles, ZnO bulk, and ZnCl<sub>2</sub>  
474 on plants and microorganisms in a natural soil. *Environmental Science and Pollution*  
475 *Research*. 2015; 22 (21): 16803-16813.  
476
- 477 44. Yadav A, Singh B, Sharma D K, Ahuja S. Effects of gamma irradiation on germination and  
478 physiological parameters of maize (*Zea mays*) genotypes. *Indian Journal of Agricultural*  
479 *Sciences*. 2015, 85 (9): 1148-52.  
480
- 481 45. Banerjee J, Kole C. *Plant Nanotechnology: An overview on concepts, strategies, and tools*.  
482 *Plant Nanotechnology*. 2016; 1-14.  
483
- 484 46. Munir T, Unir M, Rizwanb M, Kashif, A, Shahzad S, Alib N, Amin R, Zahid MFE, Alam M,  
485 Imran. (Effect of zinc oxide nanoparticles on the growth and Zn uptake in wheat (*triticum*  
486 *aestivum* L.) by seed priming method. *Digest Journal of Nanomaterials & Biostructures*  
487 (DJNB). 2018; 13.1.
- 488 47. Shojaei T R, Salleh M A M, Tabatabaei M, Mobli H, Aghbashlo M, Rashid S A, Tan T,  
489 Applications of nanotechnology and carbon nanoparticles in agriculture. In *Synthesis*.  
490 *Synthesis, technology and applications of carbon nanomaterials*. Elsevier. 2019; 247-277.  
491
- 492 48. Shalaby TA, Bayoumi Y, Abdalla N, Taha H, Alshaal T, Shehata S, Amer M, Domokos-  
493 Szabolcsy E, El-Ramady H. Nanoparticles, soils, plants and sustainable agriculture. In  
494 *Nanoscience in Food and Agriculture 1*; Shivendu, R., Nandita, D., Eric., Eds.; Springer:  
495 Cham, Switzerland. 2016; 283-312.  
496
- 497 49. Kamle M, Mahato DK, Devi S, Soni R, Tripathi V, Mishra AK, Kumar P. Nanotechnological  
498 interventions for plant health improvement and sustainable agriculture. *Biotech*. 2020; 10(4):  
499 1-11.  
500
- 501 50. Kottegoda N, Munaweera I, Madusanka N, Sandaruwan C, Sirisena D, Disanayake N, Ismail  
502 M, De Alwis A, Karunaratne V, Malwana W. Plant nutrient nanoparticles encapsulated  
503 cellulose matrix for slow and sustained release of nitrogen. *Current Science*. 2011; 101: 73-  
504 78.  
505
- 506 51. Cox A, Venkatachalam P, Sahi S, Sharma N. Silver and titanium dioxide nanoparticle toxicity  
507 in plants: a review of current research. *Plant Physiology and Biochemistry*. 2016; 107: 147-  
508 163.  
509

- 510 52. Cox A, Venkatachalam P, Sahi S, Sharma N. Reprint of silver and titanium dioxide  
511 nanoparticle toxicity in plants: A review of current research. *Plant Physiology and*  
512 *Biochemistry*. 2017; 110: 33–49.
- 513 53. Paul M.J. Improving photosynthetic metabolism for crop yields: what is going to work? *Front*  
514 *Plant Sci*.2021; <https://doi.org/10.3389/fpls.2021.743862>  
515
- 516 54. Sinclair TR, Rufty TW, Lewis RS. Increasing photosynthesis: unlikely solution for world food  
517 problem. *Trends Plant Science*. 2019; 24(11):1032–9.  
518
- 519 55. Disfani MN, Mikhak A, Kassae MZ, Maghari A. Effects of nano Fe/SiO<sub>2</sub> fertilizers on  
520 germination and growth of barley and maize. *Archives of Agronomy and Soil Science*. 2017;  
521 63 (6): 817-826.
- 522 56. Shang Y, Hasan M, Ahammed G J, Li M, Yin H, Zhou J. Applications of nanotechnology in  
523 plant growth and crop protection: a review. *Molecules*. 2019; 24(14): 2558.  
524
- 525 57. Mahajan P, Dhoke S K, Khanna A S. Effect of nano-ZnO particle suspension on growth of  
526 mung (*Vigna radiata*) and gram (*Cicer arietinum*) seedlings using plant agar  
527 method. *Nanotechnology Development*, 2013, 3(1): e1-e1.
- 528 58. Faizan M, Faraz A, Yusuf M, Khan ST, Hayat S. Zinc oxide nanoparticle mediated changes in  
529 photosynthetic efficiency and antioxidant system of tomato plants. *Photosynthetica*. 2018; 56:  
530 678e686. <https://doi.org/10.1007/s11099-017-0717-0>  
531
- 532 59. Zhang H, Du W, Peralta-Videa J R, Gardea-Torresdey J L, White J C, Keller A. Zhao,  
533 Metabolomics reveals how cucumber (*Cucumis sativus*) reprograms metabolites to cope with  
534 silver ions and silver nanoparticle-induced oxidative stress. *Environmental Science &*  
535 *Technology*, 2018; 52(14): 8016-8026.  
536
- 537 60. Du J, O' Reilly R K. Anisotropic particles with patchy, multicompartment and Janus  
538 architectures: preparation and application. *Chemical Society Reviews*. 2011; 40 (5): 2402-  
539 2416.  
540
- 541 61. He C, Liu D, Lin W. Nanomedicine applications of hybrid nanomaterials built from metal–  
542 ligand coordination bonds: nanoscale metal–organic frameworks and nanoscale coordination  
543 polymers. *Chemical Review*. 2015; 115(19):11079-11108.  
544  
545
- 546 62. Priester J H, Ge Y, Mielke R E, Horst A M, Moritz S C, Espinosa K, Holden P A. Soybean  
547 susceptibility to manufactured nanomaterials with evidence for food quality and soil fertility  
548 interruption. *Proceedings of the National Academy of Sciences*. 2012; 109 (37): E2451-  
549 E2456.  
550
- 551 63. Dijk VM, Meijerink GW. A review of food security scenario studies: Gaps and ways forward.  
552 In *The Food Puzzle: Pathways to Securing Food for All*; Achterbosch, T.J., Dorp, M., van  
553 Oriel, W.F., van Groot, J.J., Lee, J., van der Verhagen, A., Bezlepkina, I., Eds.; Wageningen  
554 UR: Wageningen, The Netherlands.2014;30--32. <https://edepot.wur.nl/349629>  
555

- 556 64. Sabir A, Yazar K, Sabir F, Kara Z, Yazici M A, Goksu N. Vine growth, yield, berry quality  
557 attributes and leaf nutrient content of grapevines as influenced by seaweed extract  
558 (*Ascophyllum nodosum*) and nanosize fertilizer pulverizations. *Scientia Horticulturae*. 2014;  
559 175: 1-8.
- 560 65. Lateef A, Nasir R, Alam S, Shah R, Khan MN, Saleem M. Synthesis and characterization  
561 of zeolite based nano-composite: An environment friendly slow release fertilizer.  
562 *Microporous and Mesoporous Materials*. 2016; 232: 174-183.
- 563  
564  
565  
566  
567  
568  
569  
570  
571  
572  
573  
574  
575  
576  
577  
578  
579  
580

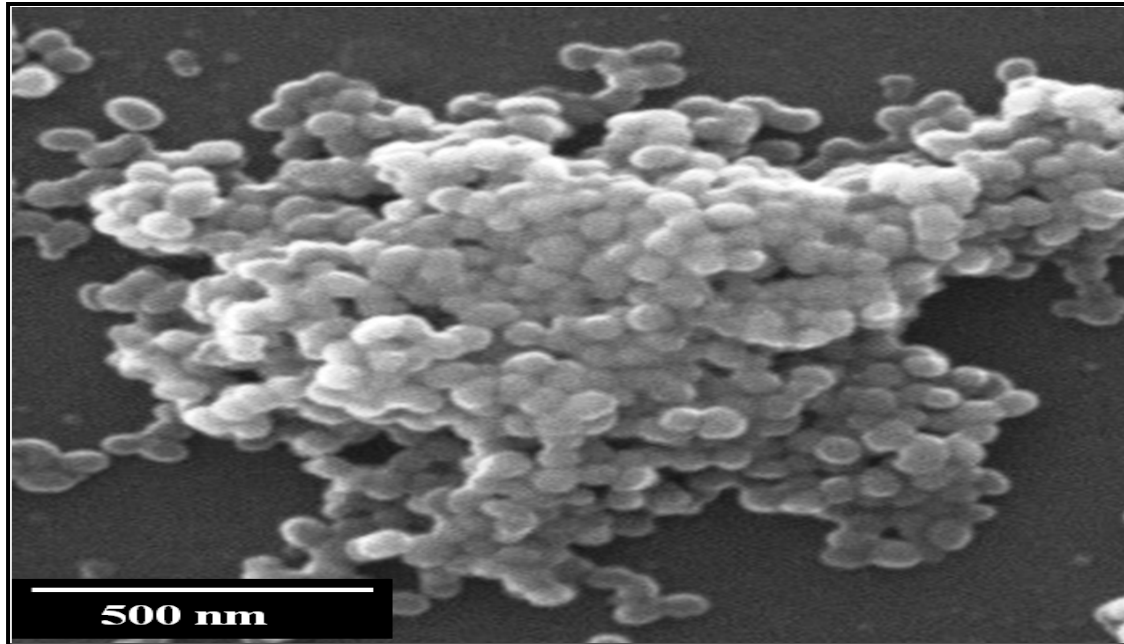

582 **Fig 1. Transmission microscopy picture of ZnO-NPs**

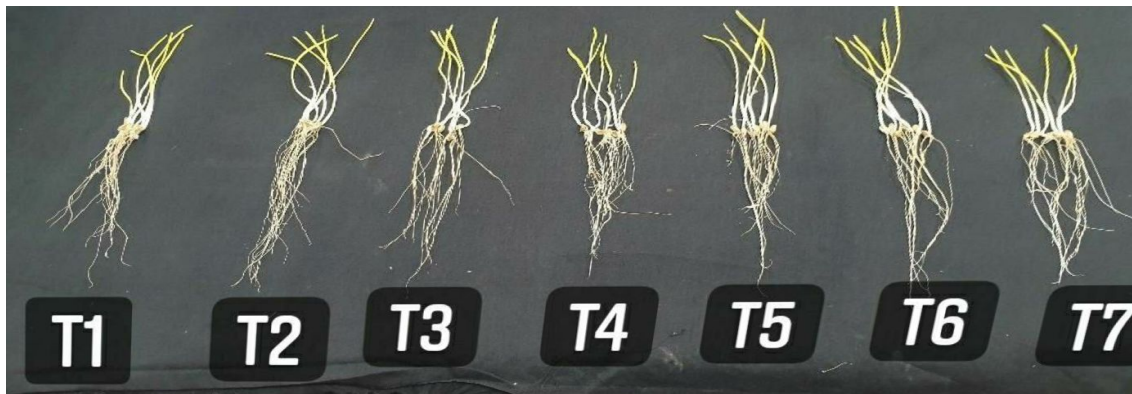

584 **Fig 2. Seedlings grown under different in ZnO and ZnSO<sub>4</sub> treatments.**

585

586

587

588

589

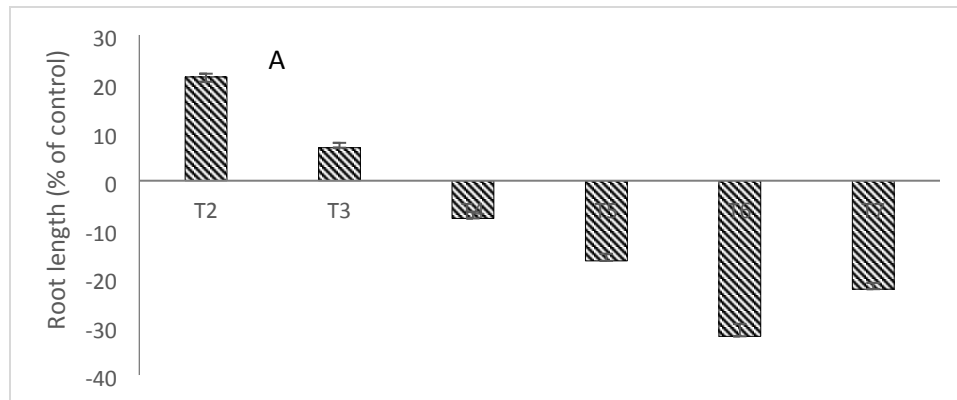

590

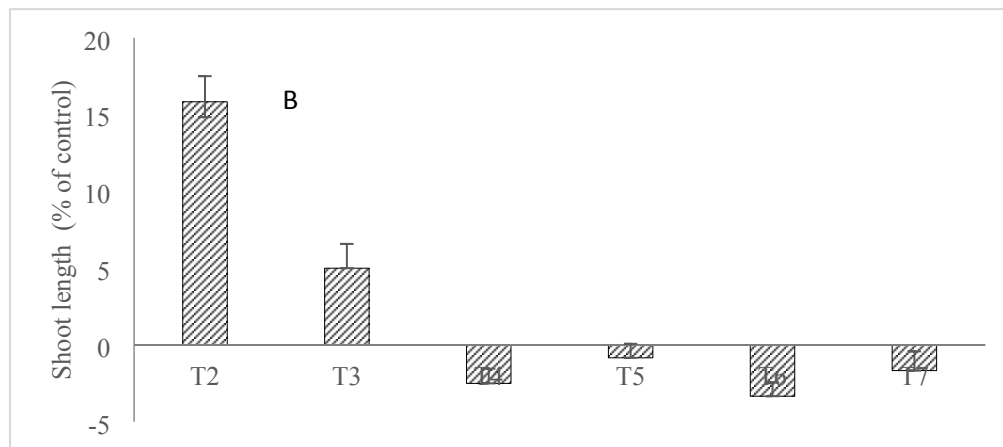

591

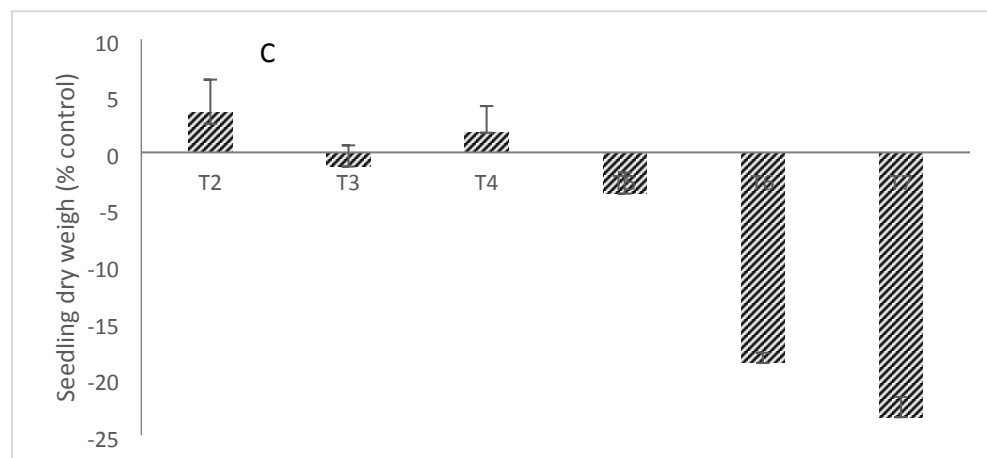

Fig. 3

592 **Fig 3. Effect of ZnO-NPs and ZnSO<sub>4</sub> on (A) root length (B) shoot length and (C) seedling**  
593 **dry weight.**

594 The comparison of seedling dry was done with the dry weight of seedling of treatment T1 and the

595 percentage changes are reported.

596

597

| <b>Symbol</b> | <b>Pot soil treatment</b>                                                                   |
|---------------|---------------------------------------------------------------------------------------------|
| <b>T1</b>     | Control                                                                                     |
| <b>T2</b>     | Application of ZnO NPs in pot soil 20 mg kg <sup>-1</sup>                                   |
| <b>T3</b>     | Application of ZnO NPs in pot soil 25 mg kg <sup>-1</sup>                                   |
| <b>T4</b>     | Application of ZnO NPs in pot soil 30 mg kg <sup>-1</sup>                                   |
| <b>T5</b>     | Application of ZnSO <sub>4</sub> in pot soil 49.2 mg kg <sup>-1</sup> (Zn equivalent to T2) |
| <b>T6</b>     | Application of ZnSO <sub>4</sub> in pot soil 61.5 mg kg <sup>-1</sup> (Zn equivalent to T3) |
| <b>T7</b>     | Application of ZnSO <sub>4</sub> in pot soil 73.8 mg kg <sup>-1</sup> (Zn equivalent to T4) |

600

601 **Table 1. Description of treatments.**

602

| Plant Growth | Seedling Vigor I |         |             | Photosynthetic rate<br>( $\mu\text{mol m}^{-2} \text{s}^{-1}$ ) |         |      | SPAD value |         | Tillers per plant |            |          |            |
|--------------|------------------|---------|-------------|-----------------------------------------------------------------|---------|------|------------|---------|-------------------|------------|----------|------------|
|              | 2019-20          | 2020-21 | Mean        | 2019-20                                                         | 2020-21 | Mean | 2019-20    | 2020-21 | Mean              | 2019-20    | 2020-21  | Mean       |
| T1           | 1998             | 2294    | 2146        | 9.9                                                             | 10.3    | 10.1 | 51.1       | 50.5    | 50.8              | 6.4        | 6.5      | 6.5        |
| T2           | 2109             | 1981    | 2045        | 8.8                                                             | 11.2    | 10   | 54.7       | 56      | 55.3              | 6.9        | 7        | 7          |
| T3           | 2087             | 2225    | 2156        | 11.3                                                            | 13.5    | 12.4 | 54.5       | 52      | 53.2              | <b>8.2</b> | <b>8</b> | <b>8.1</b> |
| T4           | <b>2132</b>      | 1964    | 2048        | 9.6                                                             | 13      | 11.3 | 55.1       | 51      | 53                | 6.5        | 6.7      | 6.6        |
| T5           | 1865             | 2067    | 1966        | 8.8                                                             | 8.21    | 8.5  | 49         | 53      | 51                | 6.8        | 6.5      | 6.7        |
| T6           | 1856             | 1943    | <b>1899</b> | 8.9                                                             | 10.2    | 9.5  | 53.3       | 51      | 52.2              | 6.8        | 6.3      | 6.6        |
| T7           | 1788             | 1632    | <b>1710</b> | 10.8                                                            | 13.3    | 12   | 51         | 47      | 49                | 6.4        | 6.2      | 6.3        |
| CD (p=0.05)  | 247.7            | 206.9   | 232.1       | ns                                                              | ns      | ns   | ns         | ns      | ns                | 1.66       | 1.50     | 1.46       |
| SE(m)        | 67.8             | 82.7    | 79.7        | ns                                                              | ns      | ns   | ns         | ns      | ns                | 0.57       | 0.46     | 0.51       |

603 ns-non significant

604 **Table 2. The effect of ZnO-NPs and ZnSO<sub>4</sub> on plant growth parameters.**

605 Two-year data of seedling vigor I, photosynthetic rates, SPAD values and tillers per plant are given. Mean data of 2 years mentioned

606 Parameters crop grown under ZnO-NPs as well as ZnSO<sub>4</sub> treatment are compared with the control treatment (T1). Data of seedling

607 Vigor I, and tiller (plant-1) shown in bold are significantly different over control treatment data.

608

609

610

611

612



| Treatment   | Biomass (g-plant <sup>-1</sup> ) |             |             | Grain weight (g-spike <sup>-1</sup> ) |            |            | Number of grains (spike <sup>-1</sup> ) |         |      | Grain yield (g-plant <sup>-1</sup> ) |         |            | 1,000 grain weight (g) |         |      | Harvest Index (%) |         |      |
|-------------|----------------------------------|-------------|-------------|---------------------------------------|------------|------------|-----------------------------------------|---------|------|--------------------------------------|---------|------------|------------------------|---------|------|-------------------|---------|------|
|             | 2019-20                          | 2020-21     | Mean        | 2020-21                               | 2020-21    | Mean       | 2019-2020                               | 2020-21 | Mean | 2019-2020                            | 2020-21 | Mean       | 2019-2020              | 2020-21 | Mean | 2019-2020         | 2020-21 | Mean |
| T1          | 11.2                             | 12.3        | 11.8        | 1                                     | 1.2        | 1.1        | 37.0                                    | 41.4    | 39.3 | 5.7                                  | 6.0     | 5.9        | 27.0                   | 29      | 28   | 50.9              | 48.8    | 49.8 |
| T2          | <b>12.1</b>                      | <b>13.5</b> | <b>12.8</b> | 1.1                                   | <b>1.3</b> | <b>1.2</b> | (g)                                     | 46.4    | 41.8 | 6.3                                  | 6.5     | 6.4        | 29.4                   | 28      | 28.7 | 52.1              | 48.1    | 50.0 |
| T3          | <b>14.7</b>                      | <b>14.3</b> | <b>14.5</b> | 1.3                                   | <b>1.3</b> | <b>1.3</b> | 42.6                                    | 44.4    | 43.5 | <b>8.1</b>                           | 7.4     | <b>7.8</b> | 30.5                   | 29.3    | 29.9 | 55.1              | 51.7    | 53.4 |
| T4          | <b>13.1</b>                      | <b>12.8</b> | <b>13.0</b> | 1                                     | 1          | 1          | 34.5                                    | 33.3    | 33.4 | 6.7                                  | 7.0     | 6.9        | 29.8                   | 30      | 29.9 | 51.1              | 54.7    | 52.9 |
| T5          | 11.7                             | 12.3        | 12.0        | 0.9                                   | 1          | 0.9        | 30.0                                    | 32.9    | 29.7 | 6.1                                  | 6.0     | 6.1        | 30.1                   | 30.4    | 30.3 | 49.2              | 45.5    | 47.3 |
| T6          | <b>12.4</b>                      | <b>13.2</b> | <b>12.8</b> | 1                                     | 1.1        | 1.1        | 34.0                                    | 37.0    | 37.2 | 6.3                                  | 7.0     | 6.7        | 29.4                   | 29.7    | 29.6 | 53.8              | 56.9    | 55.4 |
| T7          | <b>12.2</b>                      | <b>11.6</b> | 11.9        | 1                                     | 1          | 1          | 33.7                                    | 33.3    | 33.4 | 6.5                                  | 6.6     | 6.6        | 29.7                   | 30      | 29.9 | 53.3              | 56.9    | 55.0 |
| CD (p=0.05) | 0.44                             | 0.43        | 0.48        | 0.219                                 | 0.199      | 0.139      | ns                                      | ns      | ns   | 1.83                                 | 1.87    | 1.85       | ns                     | ns      | ns   | ns                | ns      | ns   |
| SE(m)       | 0.153                            | 0.157       | 0.161       | 0.078                                 | 0.092      | 0.082      | ns                                      | ns      | ns   | 0.625                                | 0.678   | 0.710      | ns                     | ns      | ns   | ns                | ns      | ns   |

614 ns-non significant

615 **Table 3. The effect of ZnO-NPs and ZnSO<sub>4</sub> on yield parameters of wheat.**

616 Two-year data of biomass, grain weight (g -plant<sup>-1</sup>), number of grains (spike<sup>-1</sup>) grain yield (g-plant<sup>-1</sup>), 1000 grain weight (g) and harvest

617 (%) are given. Mean of 2-year data of mentioned parameters crop grown under ZnO-NPs as well as ZnSO<sub>4</sub> treatment are compared

618 with the control treatment (T1). Data of biomass (g-plant<sup>-1</sup>), grain weight (g-spike<sup>-1</sup>) and grain yield (g- plant<sup>-1</sup>) shown in bold are

619 significantly different from control treatment and themselves.

620

621

622

623

| Treatment    | Root        |             |             | Stem        |             |             | Leaf        |             |             | Grains      |             |             |
|--------------|-------------|-------------|-------------|-------------|-------------|-------------|-------------|-------------|-------------|-------------|-------------|-------------|
|              | 2019-20     | 2020-21     | Mean        | 2019-20     | 2020-21     | Mean        | 2019-20     | 2020-21     | Mean        | 2019-20     | 2020-21     | Mean        |
| T1           | 30.0        | 32.8        | 31.4        | 21.5        | 18.9        | 20.2        | 7.1         | 7.7         | 7.4         | 30.1        | 33.2        | 31.7        |
| T2           | 43.8        | 40.0        | 41.9        | 24.7        | 22.4        | 23.5        | <b>12.7</b> | 10.2        | 11.4        | 36.0        | 33.4        | 34.7        |
| T3           | <b>65.0</b> | <b>61.7</b> | <b>63.4</b> | 25.8        | <b>27.4</b> | <b>26.6</b> | <b>17.0</b> | <b>19.4</b> | <b>18.2</b> | <b>40</b>   | <b>42.1</b> | <b>41.0</b> |
| T4           | <b>77.1</b> | <b>80.7</b> | <b>78.9</b> | <b>32.0</b> | <b>29.5</b> | <b>30.7</b> | <b>20.2</b> | <b>26.7</b> | <b>23.5</b> | <b>50.1</b> | <b>48.0</b> | <b>49.0</b> |
| T5           | 32.0        | 34.4        | 33.2        | 20.7        | <b>24.9</b> | 22.8        | <b>22.1</b> | <b>20.1</b> | <b>21.1</b> | 33.0        | 35.2        | 34.1        |
| T6           | 34.7        | 35.7        | 35.2        | 22.7        | 23.8        | 23.2        | <b>23.7</b> | <b>24.2</b> | <b>23.9</b> | 34.7        | 35.6        | 35.2        |
| T7           | <b>36.9</b> | 38.0        | 37.4        | 26.0        | <b>28.3</b> | <b>27.2</b> | <b>28.3</b> | <b>26.6</b> | <b>27.4</b> | <b>39.8</b> | 33.4        | 36.6        |
| CD (p <0.05) | 6.77        | 7.31        | 7.47        | 5.52        | 5.13        | 4.29        | 4.31        | 3.99        | 4.02        | 7.01        | 6.88        | 6.95        |
| SE(m)        | 2.89        | 2.65        | 2.44        | 1.72        | 1.62        | 1.67        | 1.27        | 1.33        | 1.31        | 2.41        | 2.19        | 2.27        |

624

625 **Table 4 The zinc concentration (mg kg<sup>-1</sup>) of root, stem, leaf and grains of wheat.**

626 Two-year data of zinc concentration in root, stem, leaf and grains (%) are given. Mean data of Zn contents in crop plants under ZnO-NPs as well  
627 as ZnSO<sub>4</sub> treatment are compared with the control treatment (T1) parameter. Data of Zn concentrations in different plant part shown in bold are  
628 significantly (p<0.05) different over the control (T1) as well themselves.

629
